# Supplementary material
Source: PubMed Central journal article supplement (PMC3962989)
Supplement: supp_WNL.0000000000000241_Figures.pdf [file supp_WNL.0000000000000241_Figures.pdf]

Figure e-1

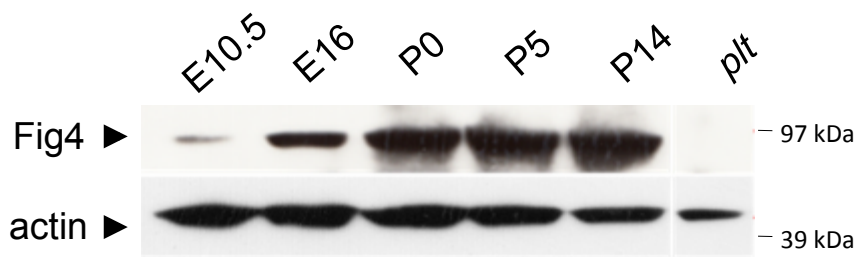

**Figure e-1: Expression profile of Fig4.** Western blot showing Fig4 expression during embryonic and postnatal development in C57BL/6 mouse brain lysates. Actin was used for internal control.

Figure e-2

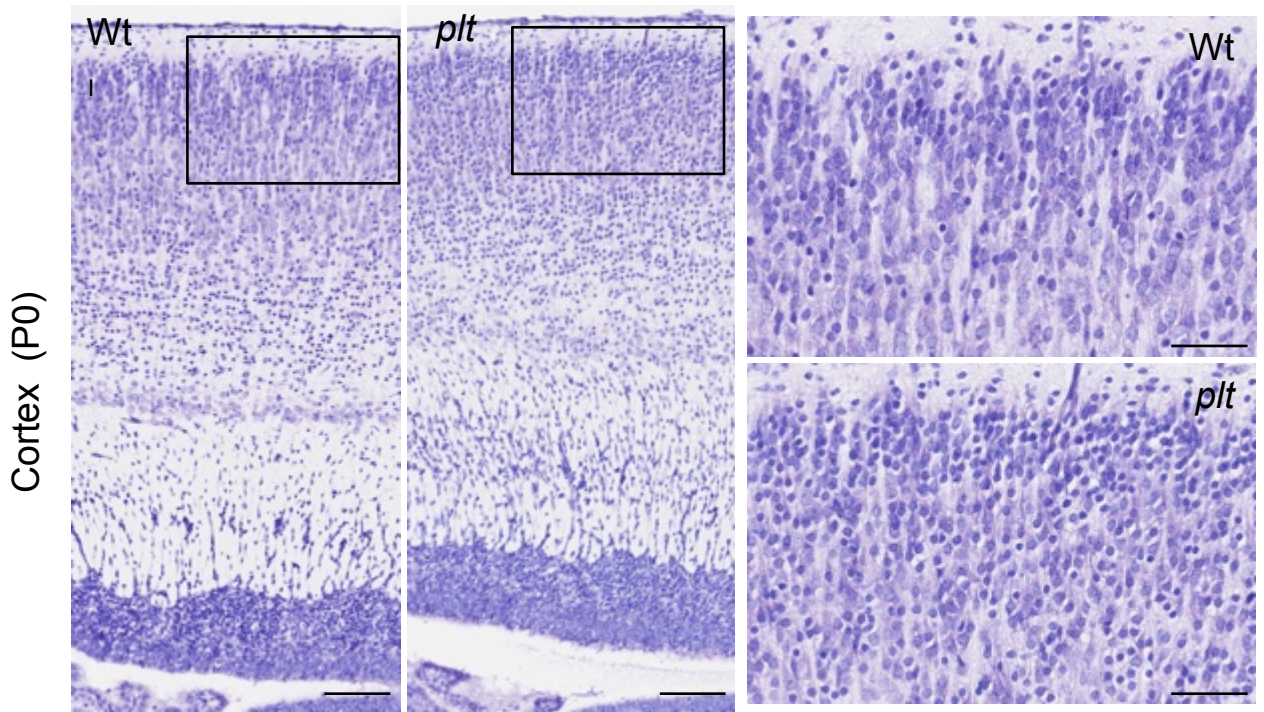

**Figure e-2: Histological and cytological alterations at P0.** Nissl staining of cortex of Wt and *plt* mouse. Boxed areas showed a higher cellular density in *plt* than Wt littermates. Many pyknotic cells were present in *plt* mice. Scale bars: 100  $\mu\text{m}$ ; boxed area (50  $\mu\text{m}$ ).

Figure e-3

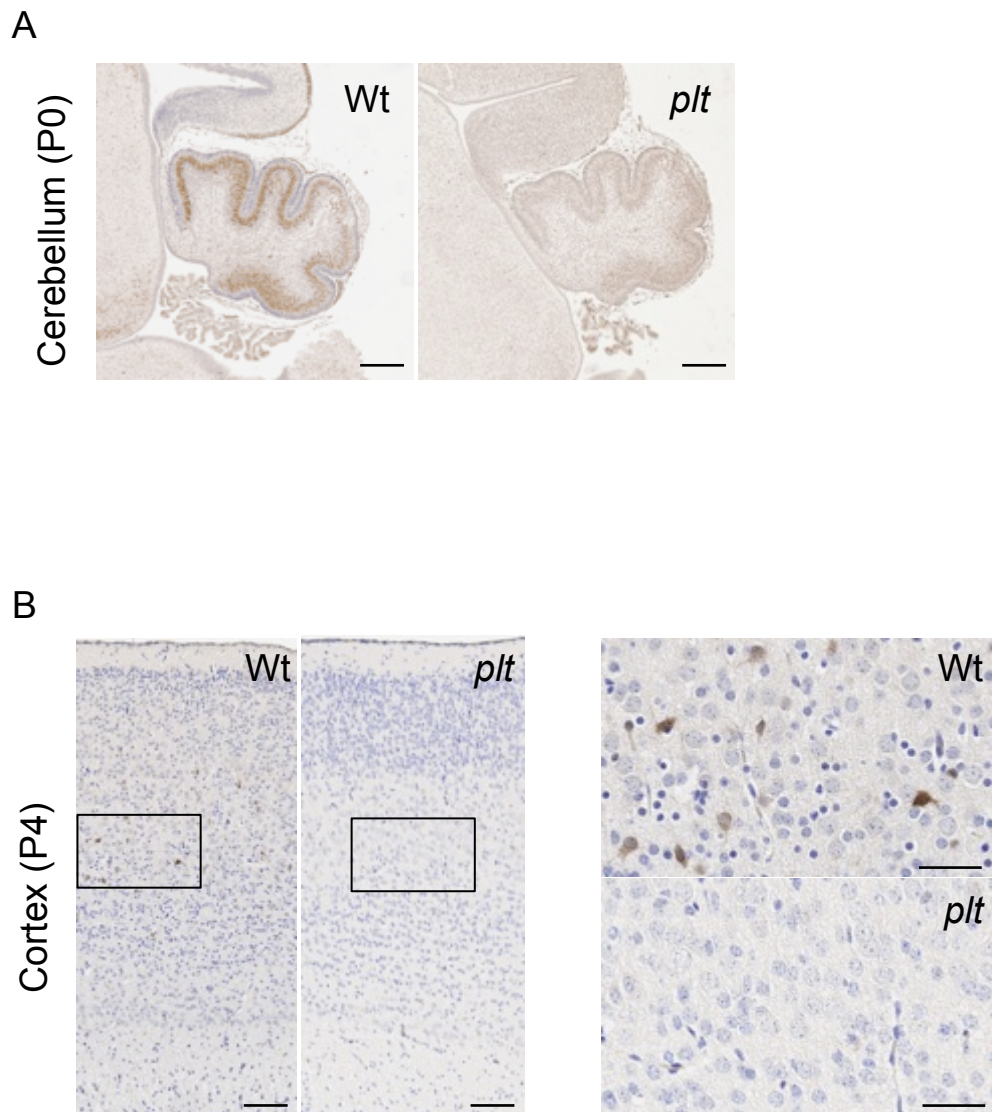

**Figure e-3: Calbindin immunohistochemistry.** (A) Weak calbindin staining in Purkinje cells of *plt* mice compared to wildtype littermates aged P0. (B). Presence of interneurons (calbindin-labeled cells) in wildtype mice that are almost undetectable in *plt* mice at P4. Scale bars: A, 250  $\mu$ m; B, 100  $\mu$ m, boxed area (50  $\mu$ m).

Figure e-4

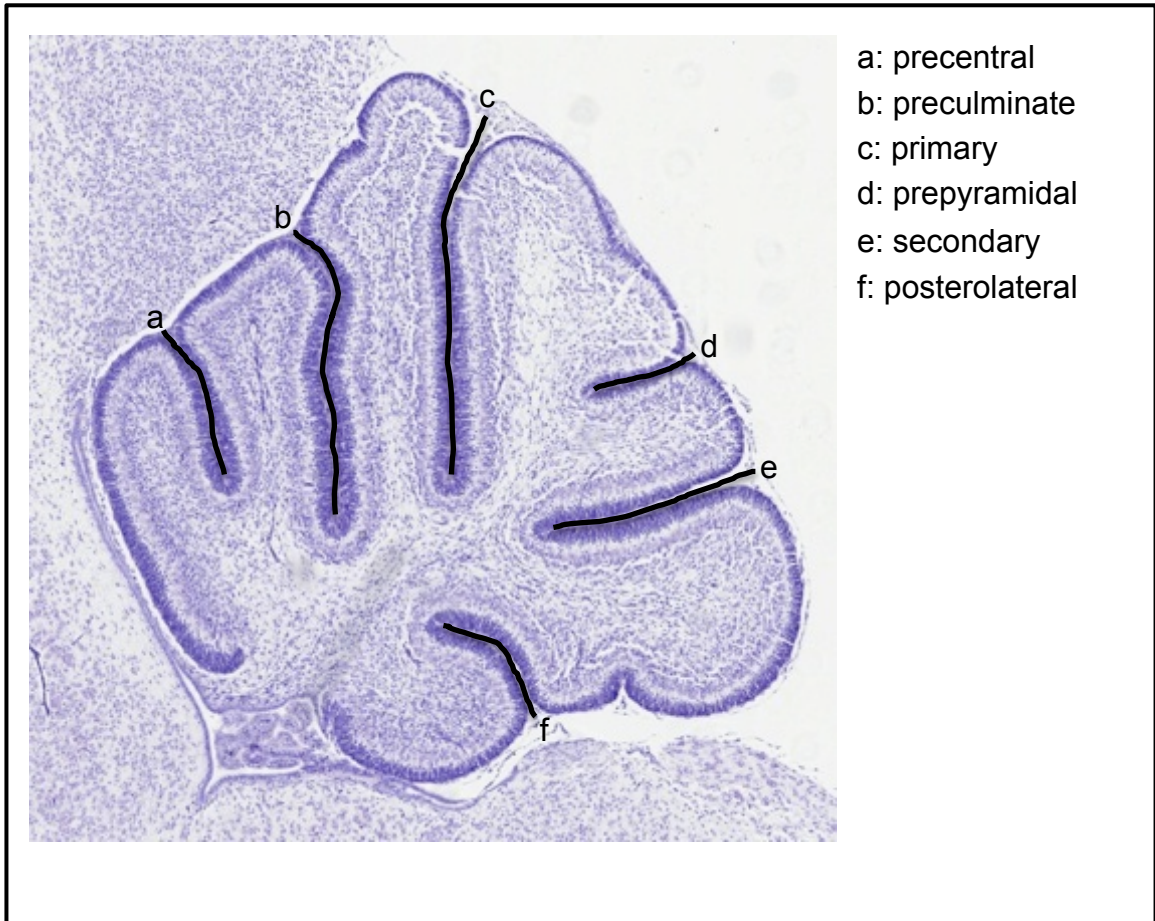

**Figure e-4: Midsagittal section of the cerebellum from a wildtype mouse.** The 6 measured fissures are the precentral, preculminate, primary, prepyramidal, secondary and posterolateral.
